# Supplementary figures and images for: Distribution of sialic acid receptors and influenza A virus of avian and swine origin in experimentally infected pigs
Source: Springer Nature journal article supplement (doi:10.1186/1743-422x-8-434), 2011-09-08

SNA

MAAI

MAAII

Trachea

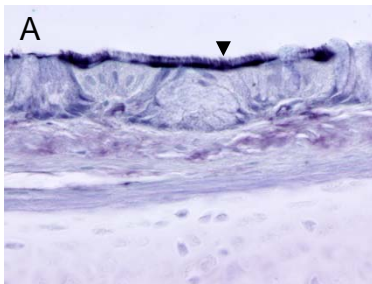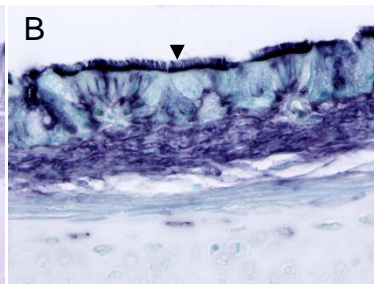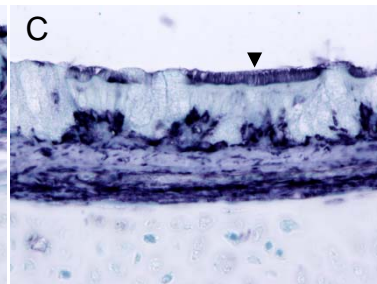

Lung

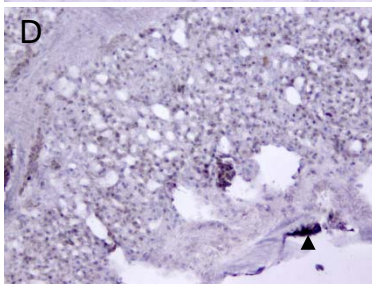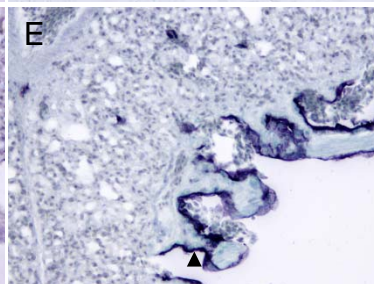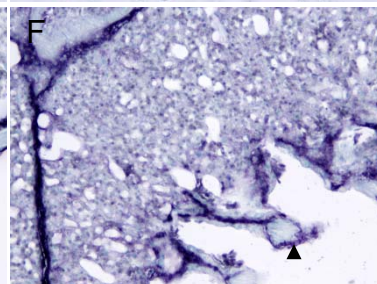

Intestine

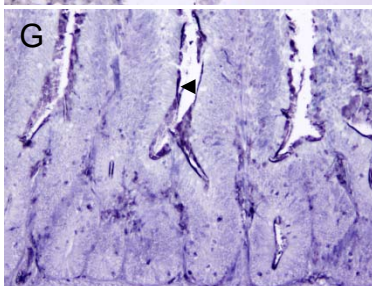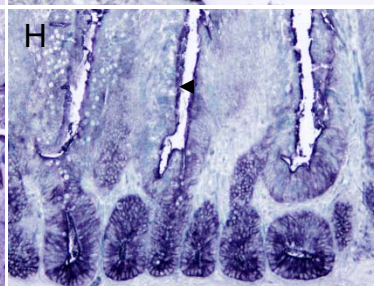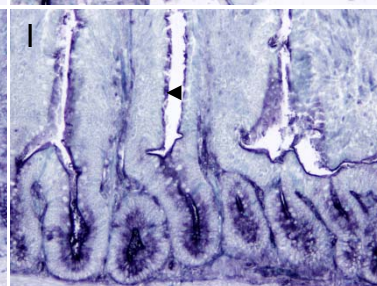

Supplement: 12985_2011_1532_MOESM3_ESM.pdf [file 12985_2011_1532_MOESM3_ESM.pdf]
